# Supplementary material
Source: PubMed Central journal article supplement (PMC4065187)
Supplement: epi-9-896-s01.pdf [file epi-9-896-s01.pdf]

## **Supplemental Material to:**

**You-Wei Zhang, Yun Zheng, Jing-Zi Wang, Xiao-Xia Lu, Zhu  
Wang, Long-Bang Chen, Xiao-Xiang Guan,  
and Jian-Dong Tong**

**Integrated analysis of DNA methylation and mRNA  
expression profiling reveals candidate genes associated  
with cisplatin resistance in non-small cell lung cancer**

**Epigenetics 2014; 9(6)**

**<http://dx.doi.org/10.4161/epi.28601>**

**[http://www.landesbioscience.com/journals/epigenetics/  
article/28601](http://www.landesbioscience.com/journals/epigenetics/article/28601)**

## Supplementary Information

**Figure S1.** Integrated circos view of hypermethylated and downregulated genes in A549/DDP identified by microarrays. The outer ring (red) represents expression log fold change A549 vs. A549/DDP; the inner ring (blue) represents methylation  $\Delta_{\beta}$  A549 vs. A549/DDP

**Figure S2.** Resistance index of A549/DDP was determined by MTT.

**Table S1.** Hypermethylated and downregulated genes in A549/DDP identified by microarrays.

**Table S2.** GO analysis: Biological Process

**Table S3.** GO analysis: Cellular Component

**Table S4.** GO analysis: Molecular Function

**Table S5.** KEGG Pathway analysis

**Table S6.** Gene expression validated by a self-assembling quantitative PCR array.

**Table S7.** Data of lung adenocarcinoma and squamous cell carcinoma publicly available from TCGA Project.

**Table S8.** List of primers.

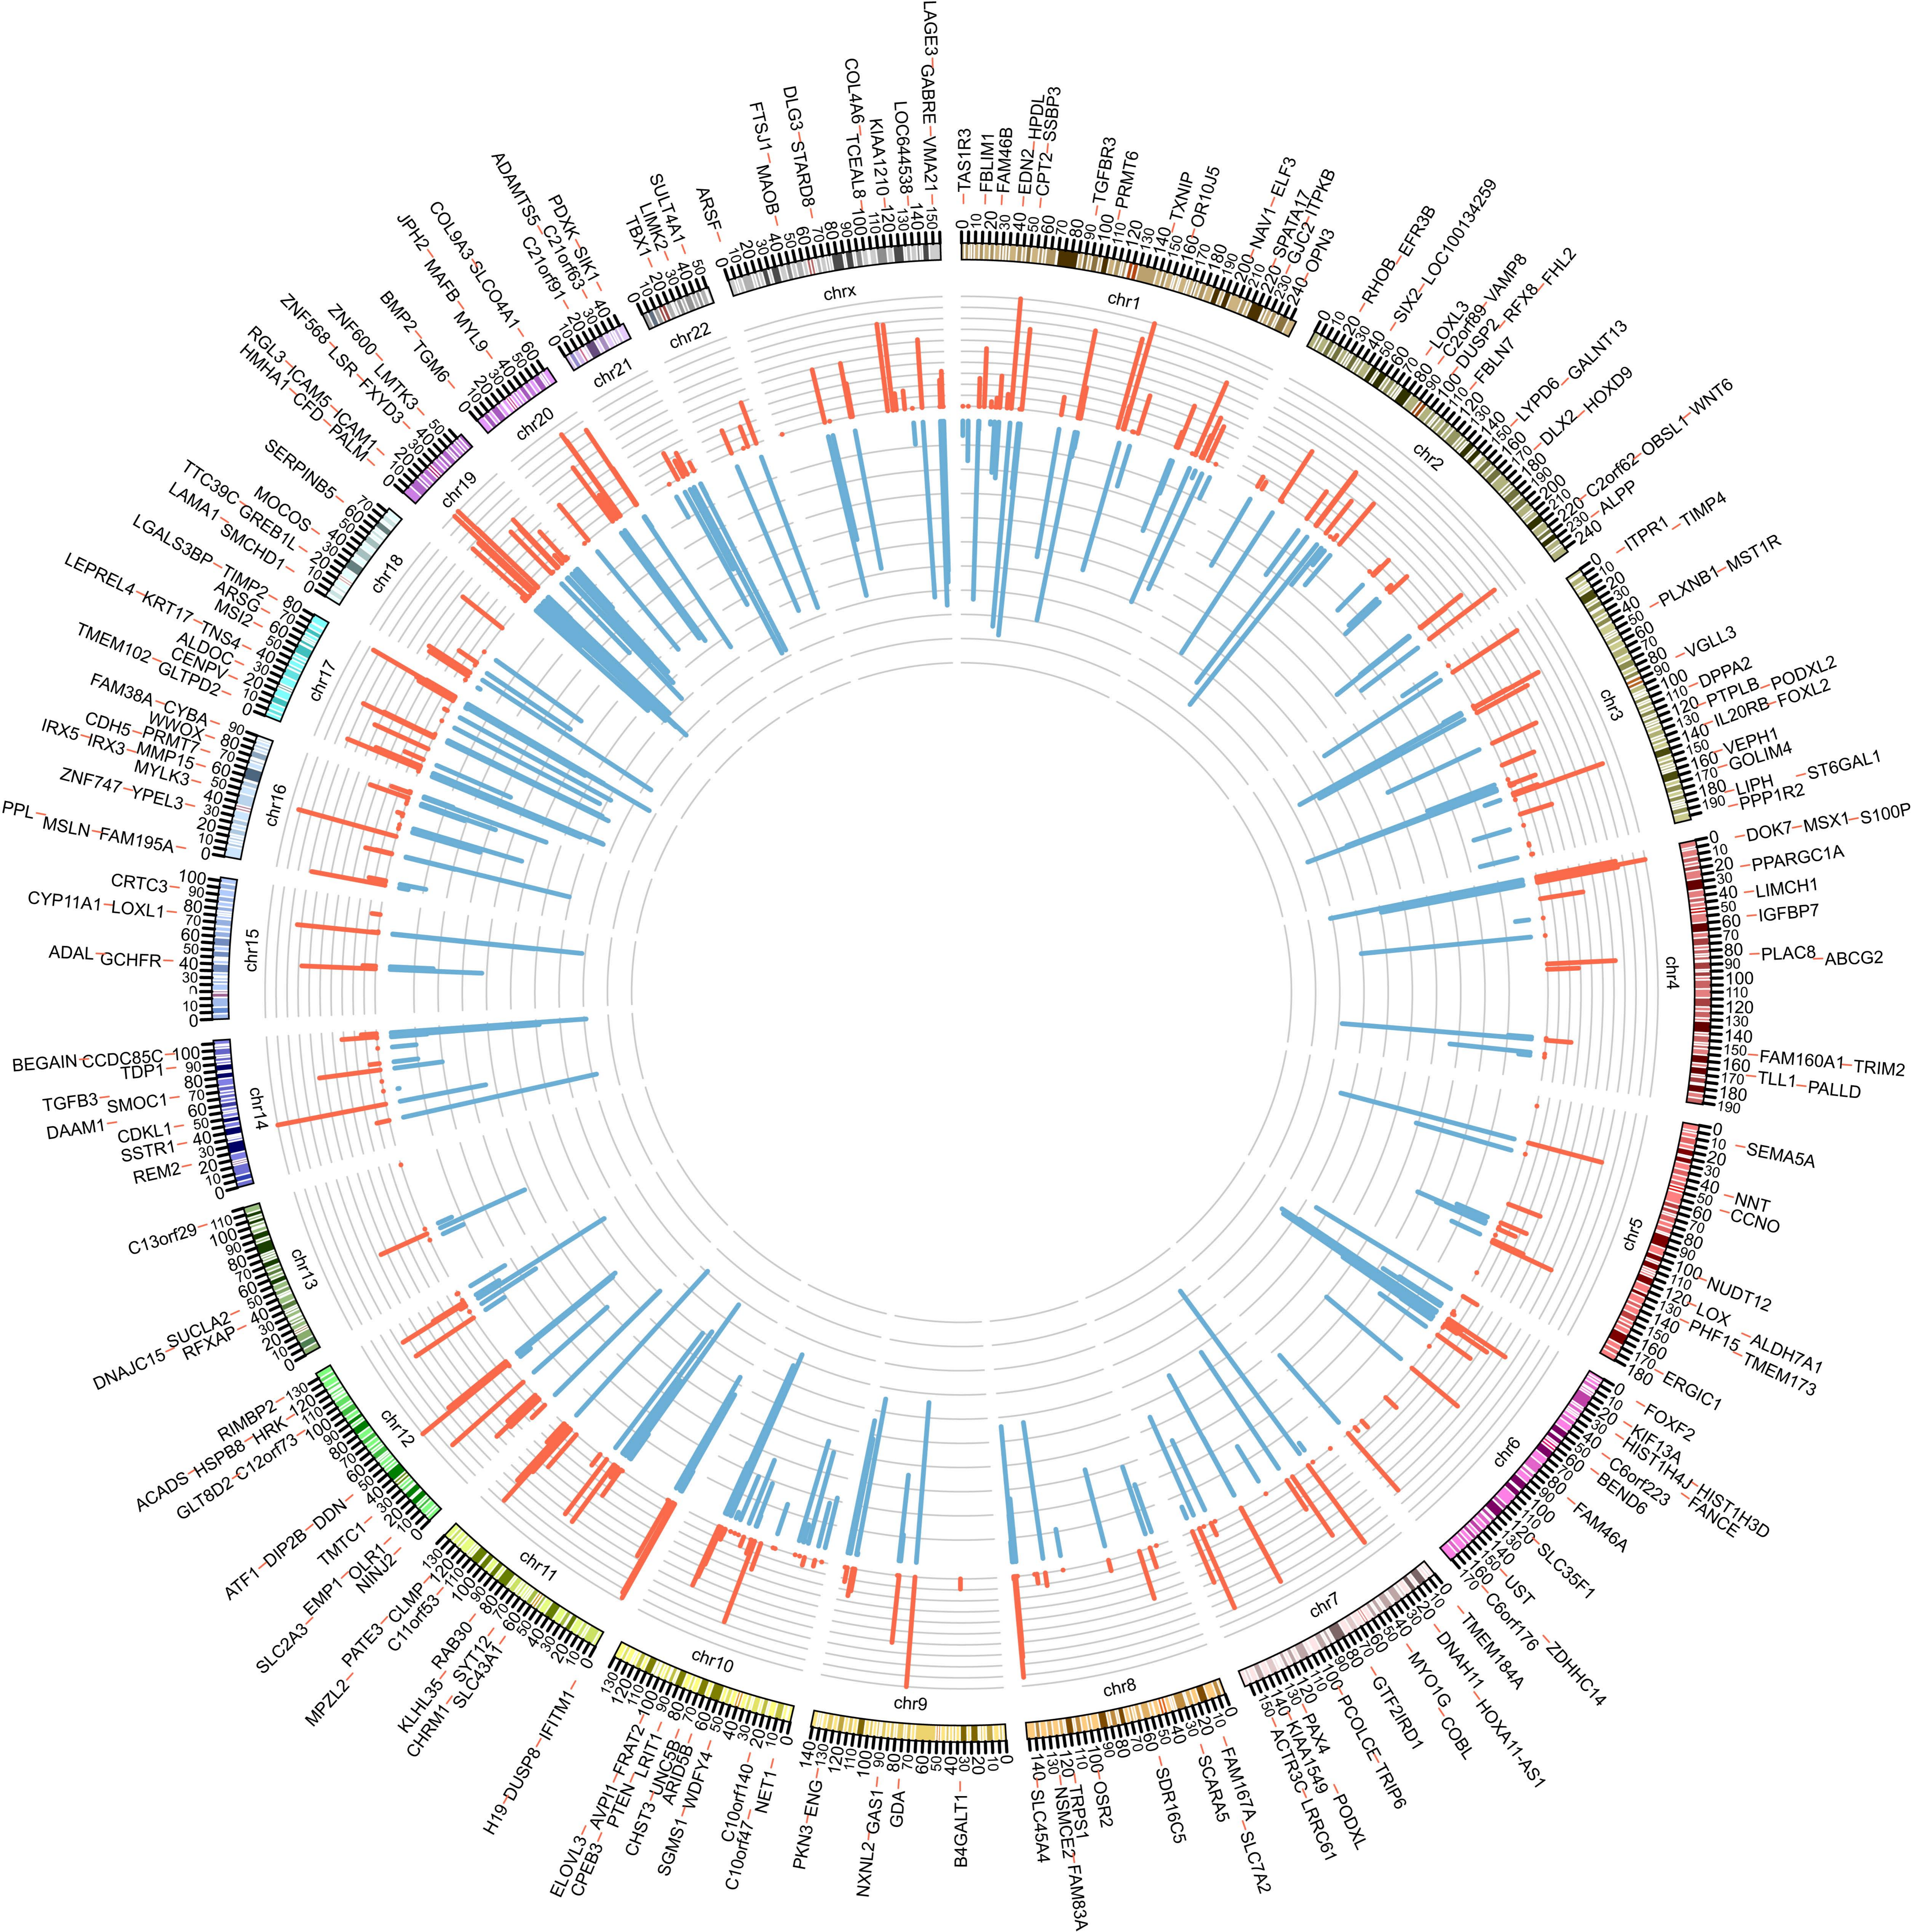

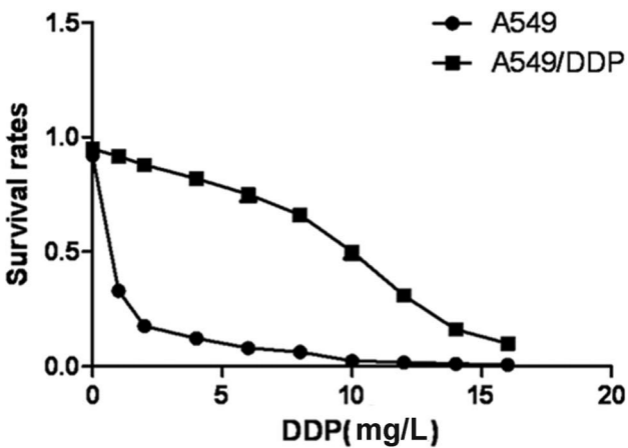

**Supplementary Table S8. List of primers used in realtime-PCR, quantitative methylation-specific PCR(M) and bisulphite sequencing (B)**

| Gene Name | Primer Sequence(5'-3')                                      | Tm (°C) | Product (bp) |
|-----------|-------------------------------------------------------------|---------|--------------|
| GAPDH     | F: CAATGACCCCTTCATTGACC<br>R: TGAAGATGGTGTGGGATT            | 55      | 135          |
| GAS1      | F:CCTCATTCAAGCTCAACCACA<br>R:GAAGACTTTGCCGCAGTAGG           | 59      | 247          |
| TIMP      | F:GCCAGGACTATTCCCTTTCC<br>R:TGCCAGTCAGCCTGTTTATG            | 59      | 162          |
| ICAM1     | F:GGCTGGAGCTGTTTGAAGA<br>R:TCACACTGACTGAGGCCTTG             | 60      | 249          |
| WISP2     | F:AGGTATGGCAGAGGTGCAAG<br>R:AGGGGAAGTCGGAGAGAAAG            | 60      | 155          |
| BMP2(M)   | F:GTAGGTCGATTATGGTGGTCG<br>R:TCGTCAAAAACTAAAATAAAAAACG      | 57      | 154          |
| CLMP (M)  | F:GTCGATTAGGGTTTTTTTTATCGA<br>R:TACACATTTTAACCAAAACCACGTA   | 54      | 249          |
| GAS1(M)   | F:TAGTTTTTCGGGTGATTAAGAGTTC<br>R:ATACATAATAAAAAACACCGCGAC   | 59      | 135          |
| ICAM1(M)  | F:CGCGATTTTTTTGGTTTTTC<br>R:TATTTACTTAACCACCGCCTATACG       | 54      | 169          |
| LOXL1(M)  | F:TAGTTGATTTAGTGGGAGAATAACG<br>R:CCGAAAACACTCTCGAAACG       | 60      | 102          |
| HSPB8(M)  | F:GGTTAGGCGAGGTGGTTTAC<br>R:CCAAACTAAAACGCAATTACG           | 55      | 257          |
| S100P(M)  | F:TATAGAGTGTTTTAAGAAAGGGATGA<br>R:TACTAACACCCAACGTACTAACACG | 57      | 108          |
| WISP2(M)  | F:ATTGGTTTAGGTTTTTATATATATACGC<br>R:CAAACACACACAAACACACG    | 57      | 115          |
| GDA(M)    | F:GGTAACGTAGAGAGAATTTTGGC<br>R:CTACTATCGAACCAATTATAACGTT    | 74      | 103          |
| TIMP4(M)  | F:GATTTTCGGATTTATTAAGTGTCGA<br>R: AACCTAAAACGAAAAACACAACG   | 54      | 250          |
| WISP2 (B) | F: GTTTTTGGTGTGGTATTGGTTTA<br>R: CTCTCATATCCCCTACAAAACCA    | 60      | 345          |
| TIMP4 (B) | F: AGAGTGGTAGATGTGTTGTTGAG<br>R: TTAACCCTTAAAACCACCTCATA    | 59      | 252          |
| ICAM1 (B) | F: TTTTTTTTTGGGAGTTGTAAAGA<br>R: CTCCCTCCACTAAAAAATACCCC    | 60      | 256          |
| GAS1 (B)  | F: ATTGGTTGTAGGYGTAGTTGTA<br>R: AACTATTCATTTCCAAAAAACCA     | 59      | 414          |

---

|            |                                                               |    |     |
|------------|---------------------------------------------------------------|----|-----|
| GDA (B)    | F: TGAGGAGGTAGGGAGTTAGTTT<br>R: CCAAATTCCTTACACCTATCCT        | 59 | 374 |
| LOXL1 (B)  | F: GAGTTGGGGTAAGTAAGGAGTT<br>R: TATTCTCCCACTAAATCAACTACC      | 59 | 256 |
| CLMP (B)   | F: AAGTGGGTGYGAAGGTAGTTAG<br>R: ACCAAAAAATTCTACTCCCTCT        | 59 | 327 |
| HSP8 (B1)  | F: TAGTTTGGGTAGTTTGGGAAGT<br>R: CTACCCAAAATCACACAACAA         | 59 | 254 |
| HSP8 (B2)  | F: GTGGTTTTGTTTTTTGAGTTTT<br>R: TCACACACACTTTCAAAACT          | 59 | 351 |
| BMP2 (B)   | F: TAAGTTAGGAGGGTATTTTGGA<br>R: ACTAACTACCCTCTCCAACC          | 56 | 438 |
| S100P (B1) | F: GGTTTTAGGGAATTTGATTTAATAGGT<br>R: TCTATATCCTTCAAAAACCCAATT | 59 | 328 |
| S100P (B2) | F: GGGAGTTTTTTGTTTGGTTTTATAG<br>R: CACAATAACATCCTCATTCTAAC    | 61 | 283 |
| S100P (B3) | F: GAATGAGGATGTTATTGTGGTTTAGT<br>R: CACCTCCTCCTAAAACTAACAAA   | 59 | 297 |
| S100P (B4) | F: GGTGGGTTTGAATTTAGTATTATGA<br>R: CAAAAACCTAATAACTCCTTCTCC   | 60 | 156 |

---
